# Supplementary material for: From a polyoxotitanium cage to TiO2/C composites, a novel strategy for nanoporous materials
Source: Royal Society of Chemistry journal article supplement (doi:10.1039/c4ta05441e), 2014-11-25

## Experimental Section

Anhydrous  $\text{TiCl}_4$ , toluene and glacial acetic acid were acquired from Sigma Aldrich chemical company. All analytical and spectroscopic samples were prepared inside a Saffron Scientific (type  $\beta$ ) glovebox, equipped with a closed loop recirculation system for the removal of moisture and oxygen (operating at ca. 2.1-2.5 vppm  $\text{O}_2$ ).

IR spectra were recorded using a Nicolet 6700 spectrometer (Thermo Fisher Nicolet, USA) with KBr pellets. Powder X-ray diffraction (XRD) experiments were performed using a X'Pert Pro diffractometer with  $\text{Cu-K}\alpha$  radiation ( $\lambda = 1.5418 \text{ \AA}$ ) operating at 40 kV and 40 mA and the scanning angle ranged from  $10^\circ$  to  $90^\circ$  of  $2\theta$ . Both carbon and hydrogen analyses were done using a varioMicro Elemental analyzer (Elementar Analysensysteme GmbH, Germany). Scanning electron microscopy (SEM) images were collected using a field emission scanning electron microscope (Hitachi S-4800). Transmission electron microscopy (TEM) was performed with a FEI Tecnai G2 F30 electron microscope operating at an accelerating voltage of 300 kV. The surface composition of sample B were determined by energy dispersive spectroscopy (EDS). EDS data of sample B was collected using an Thermo SCIENTIFIC energy dispersive X-ray spectroscopy system attached to a Hitachi S-4800 SEM, with an acceleration voltage of 15keV. X-ray photoelectron spectra (XPS) was operated on a photoelectron spectrometer (Kratos AXIS Ultra DLD, Shimadzu, Japan).

### *Synthesis and Characterisation of 1*

A mixture of 10.0ml  $\text{TiCl}_4$  (91.0 mmol), 20.0ml dry toluene and 20ml glacial acetic acid was stirred under nitrogen at  $35^\circ\text{C}$  for 30 minutes. Cooling at  $1^\circ\text{C}$  per hour to room temperature ( $20^\circ\text{C}$ ) gave colorless crystals of **1** (8.73g, 39% based on  $\text{TiCl}_4$ ). Anal. Calc. (%) for  $\text{C}_8\text{H}_{14}\text{Cl}_4\text{O}_9\text{Ti}_2$ : C, 19.54; H, 2.87. Found (%): C, 19.52; H, 2.80. IR data (KBr,  $\text{cm}^{-1}$ ) for **1**: 3270s, 2930w, 1636m, 1587m, 1503s, 1489s, 1313w, 1275m, 1147s, 1112s, 1089s, 941w, 825w, 754m, 698m, 626m, 525m.

**Fig. S1** Crystals image of cage **1**

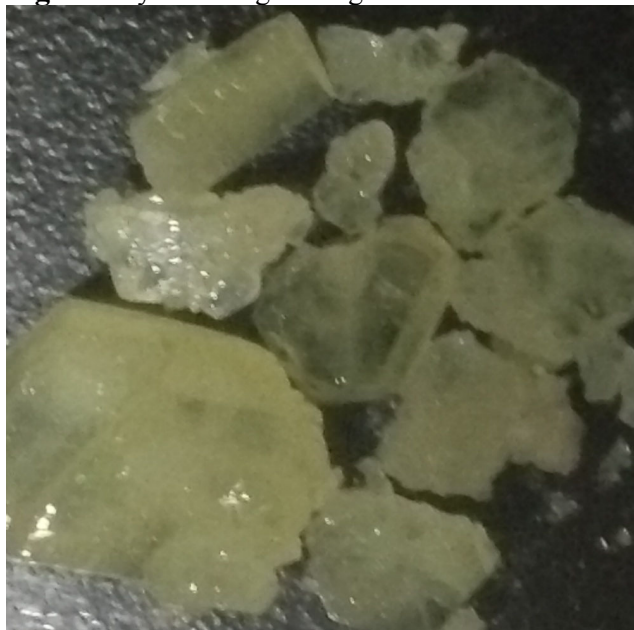

### *Preparation of A and B*

1.4g dried crystals of cage **1** was performed at  $500^\circ\text{C}$  for 5 hour in an air flow, a light yellow solid of **A** was obtained.

1.5g dried crystals of cage **1** was performed at 500 °C for 5 hour in a purified nitrogen flow, a black solid of **B** was obtained.

Elemental Analysis of **A** and **B**:

**A**, C 0.16%, H 0.52%:

**B**, C 16.69%, H 0.98%

These results can be compared to EDS measurements, which give similar C content, presumably because they overestimate the C content at which is at the surface of the samples.

**Fig. S2** Images of **A**

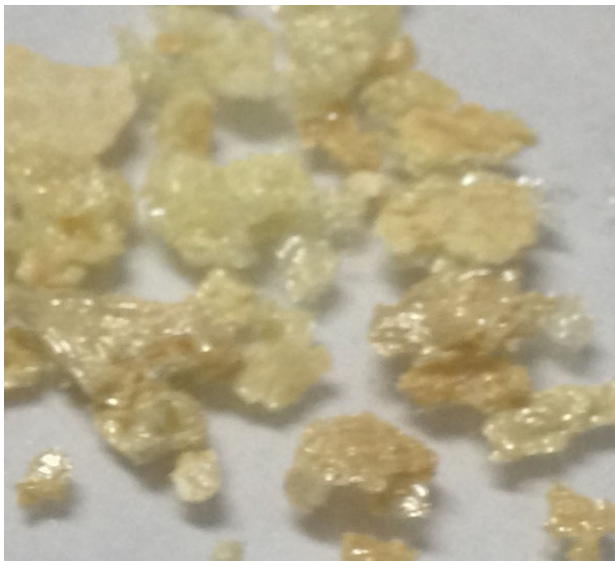

**Fig. S3** Images of **B**

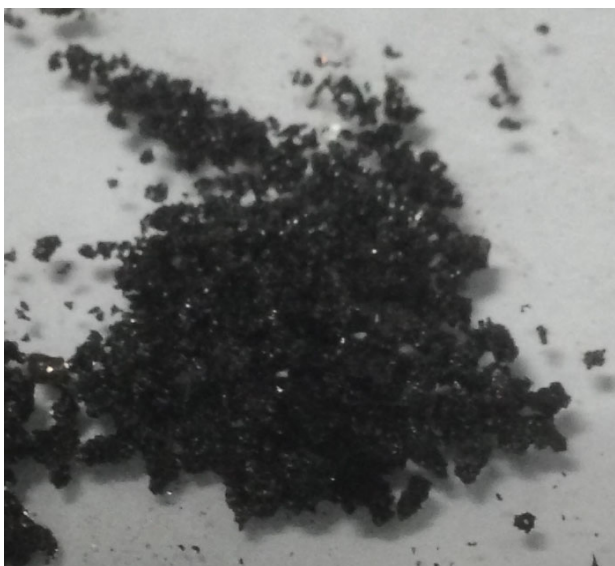

*Preparation of electrodes*

Electrode **A** was prepared by coating a mixture containing 90% powder of **A**, 10% PVDF binder on an Indium-Tin-Oxide glass (Fig 7a) or a Nickel foil (Fig 7b), followed by drying at 60 °C for 24 hour.

Electrode **B** was prepared by coating a mixture containing 90% powder of **B**, 10% PVDF binder on Indium-Tin-Oxide glass (Fig 7a) or a Nickel foil (Fig 7b), followed by drying at 60 °C for 24 hour.

**Fig. S4** Colors of Electrode **A** at different potentials

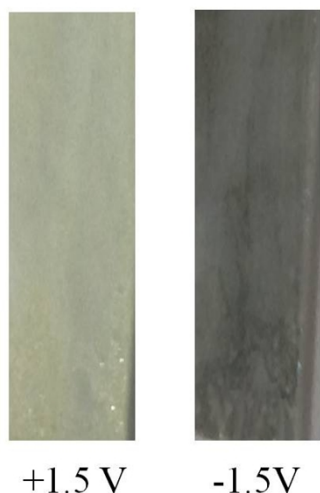

#### *Calculation of specific capacitance of **B***

The specific capacitance of **B** is calculated according to the following equation:<sup>1-2</sup>

$$C_B = \frac{Q_B}{\Delta V \times m_B}$$

Where C (F/g) is the specific capacitance, Q (C) is the average charge during the charging and discharging process,  $\Delta V$  (V) is the potential window, and m (g) is the mass of **B**.

1. J. Yan, E. Khoo, A. Sumboja, P. S. Lee, *ACS Nano*, 2010, **4**, 4247.
2. J. Yan, Z. J. Fan, T. Wei, J. Cheng, B. Shao, K. Wang, L. P. Song, M. L. Zhang, *J. Power Sources* 2009, **194**, 1202–1207.

#### *Single Crystal X-ray Crystallography*

Crystals data were collected on a Bruker Smart Apex CCD diffractometer. The structures were solved by Direct Methods and refined by full-matrix least squares on  $F^2$ . (SHELX, Sheldrick, G. M. *Acta Crystallogr.* **2008**, *A64*, 112).

**Table S1** Details of the structure solutions and refinements of **1**.

|                                                              |                                                                             |
|--------------------------------------------------------------|-----------------------------------------------------------------------------|
| Compound                                                     | <b>1</b>                                                                    |
| Chemical formula                                             | <b>C<sub>8</sub>H<sub>14</sub>Cl<sub>4</sub>O<sub>9</sub>Ti<sub>2</sub></b> |
| <i>FW</i>                                                    | 491.79                                                                      |
| Crystal system                                               | Orthorhombic                                                                |
| Space group                                                  | <i>Pnma</i>                                                                 |
| Unit cell dimensions                                         |                                                                             |
| <i>a</i> (Å)                                                 | 12.6154(9)                                                                  |
| <i>b</i> (Å)                                                 | 18.5017(14)                                                                 |
| <i>c</i> (Å)                                                 | 7.6960(5)                                                                   |
| <i>V</i> (Å <sup>3</sup> )                                   | 1796.3(2)                                                                   |
| <i>Z</i>                                                     | 4                                                                           |
| $\rho_{\text{calc}}$ (Mg/m <sup>3</sup> )                    | 1.818                                                                       |
| $\mu$ (Mo-K $\alpha$ ) (mm <sup>-1</sup> )                   | 1.520                                                                       |
| reflections collected                                        | 17798                                                                       |
| independent reflections<br>( <i>R<sub>m</sub></i> )          | 1907<br>(0.0423)                                                            |
| <i>R</i> 1, <i>wR</i> 2 [ <i>I</i> >2 $\sigma$ ( <i>I</i> )] | 0.0435,<br>0.1096                                                           |
| <i>R</i> 1, <i>wR</i> 2 (all data)                           | 0.0492,<br>0.1132                                                           |

**Fig. S5** View down the *c* axis of the crystal packing diagram of **1**

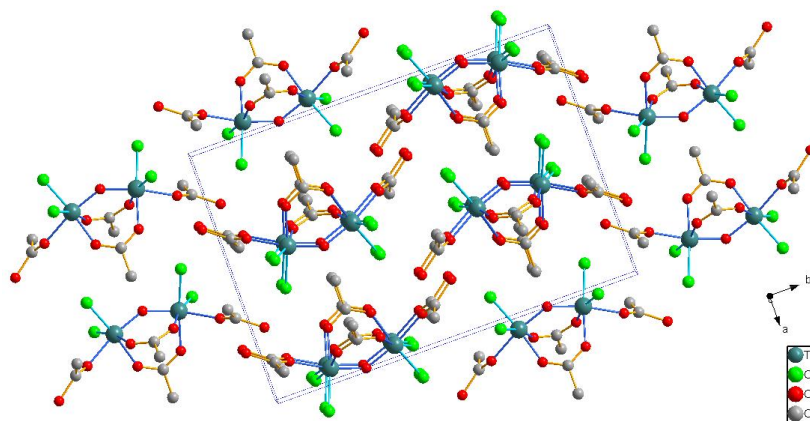

**Fig. S6** The powder XRD results of **A** and **B**.

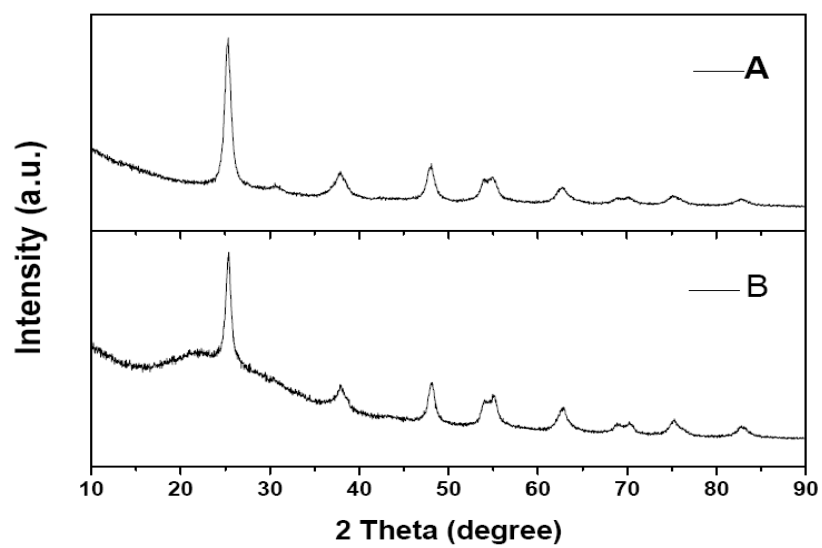

*EDS Analysis of A and B*

**Fig. S7** EDS on sample A.

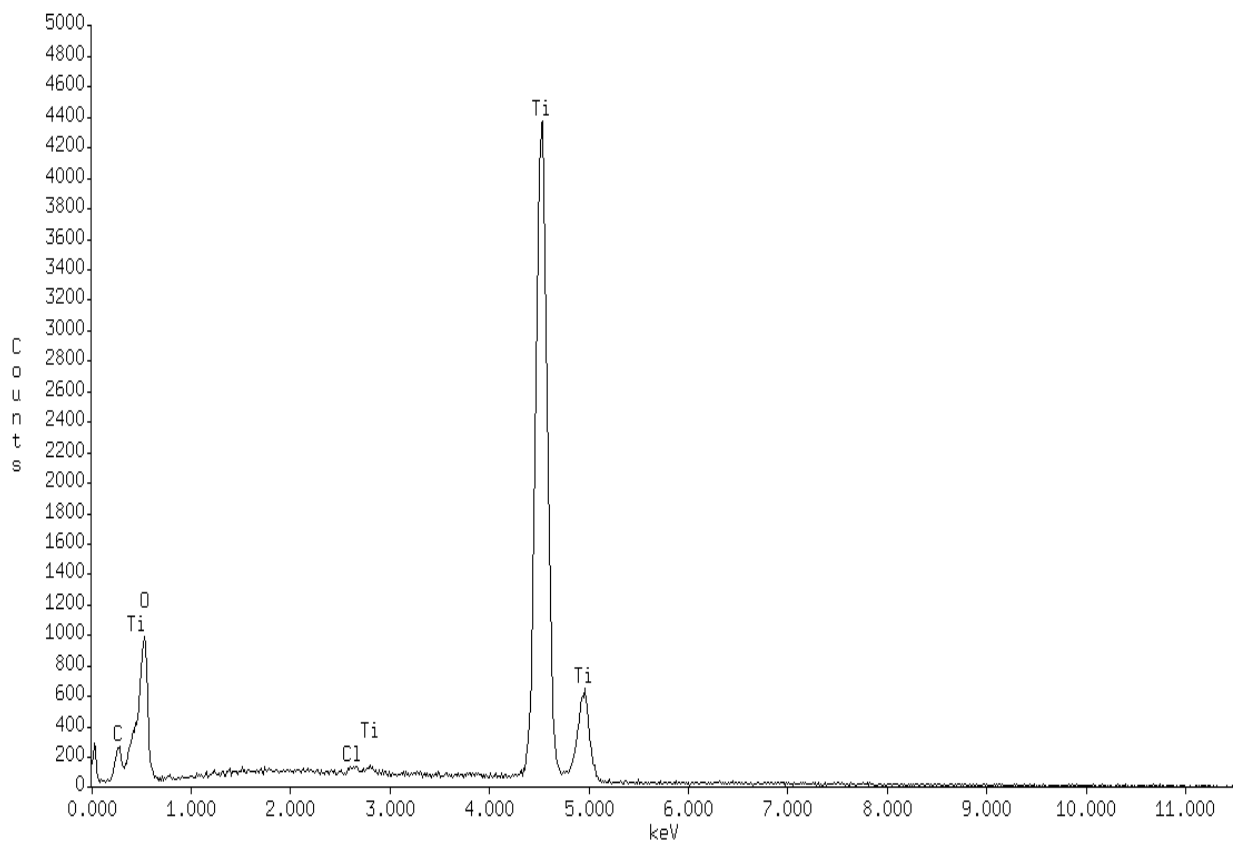

**Table S2 EDS on sample A.**

| Element | Atomic Percentage | Weight Percentage |
|---------|-------------------|-------------------|
| C       | 7.53 %            | 3.48 %            |
| O       | 60.24 %           | 37.11%            |
| Cl      | 0.07 %            | 0.10 %            |
| Ti      | 32.16 %           | 59.31 %           |

**Fig. S8 EDS on sample B.**

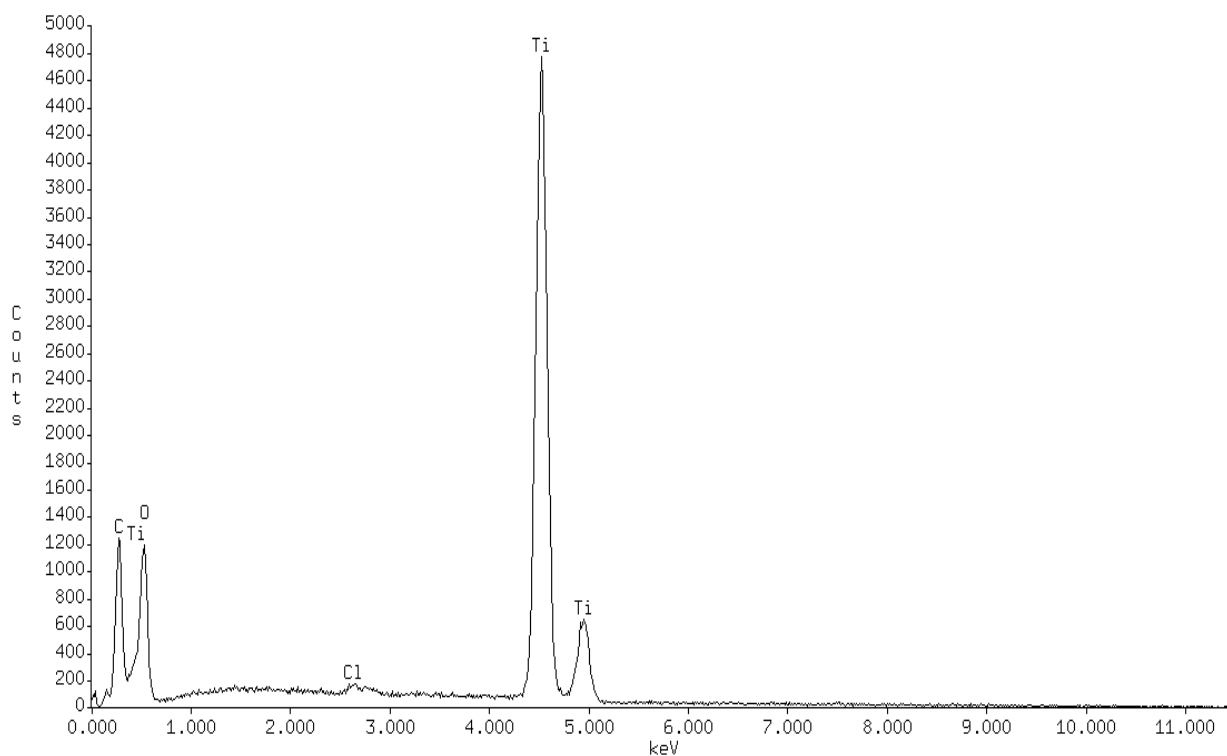

**Table S3 EDS on sample B.**

| Element | Atomic Percentage | Weight Percentage |
|---------|-------------------|-------------------|
| C       | 26.81 %           | 14.64 %           |
| O       | 51.01 %           | 37.11 %           |
| Cl      | 0.12 %            | 0.19 %            |
| Ti      | 22.06 %           | 48.05 %           |

*XPS Analysis of A and B*

**Fig. S9** XPS signal of A for Ti 2*p* region.

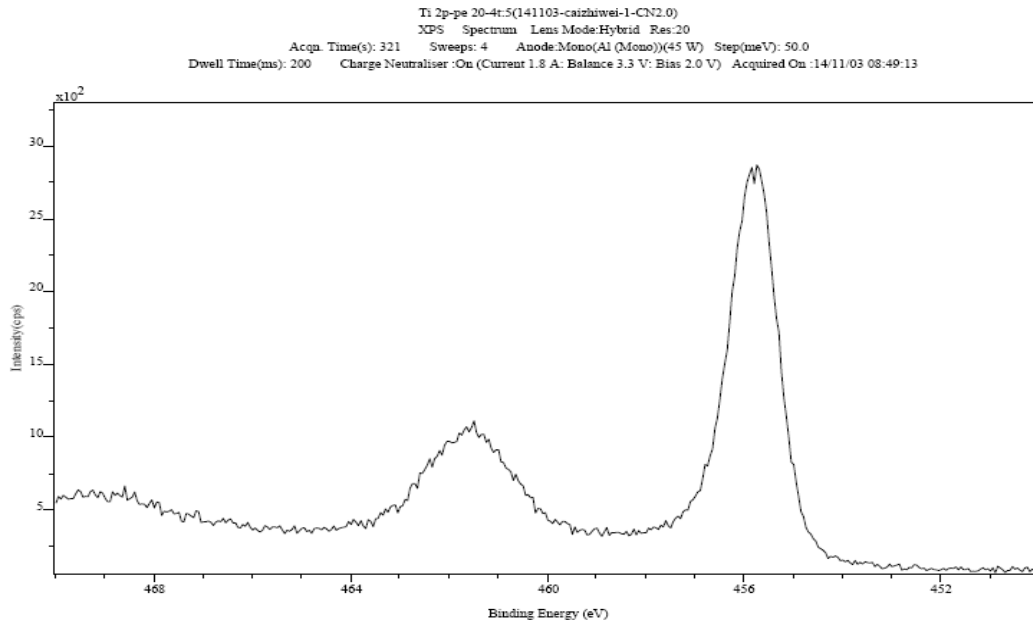

**Fig. S10** XPS signal of A for Cl 2*p* region.

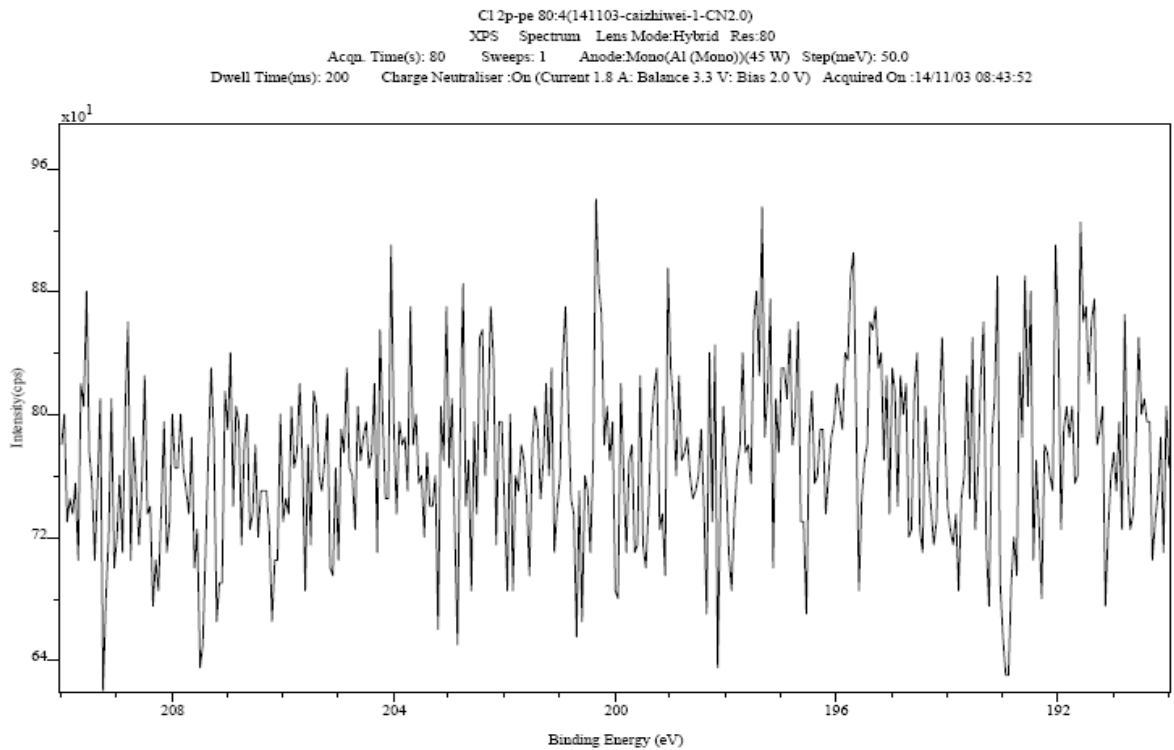

**Fig. S11** XPS survey spectra of **A**

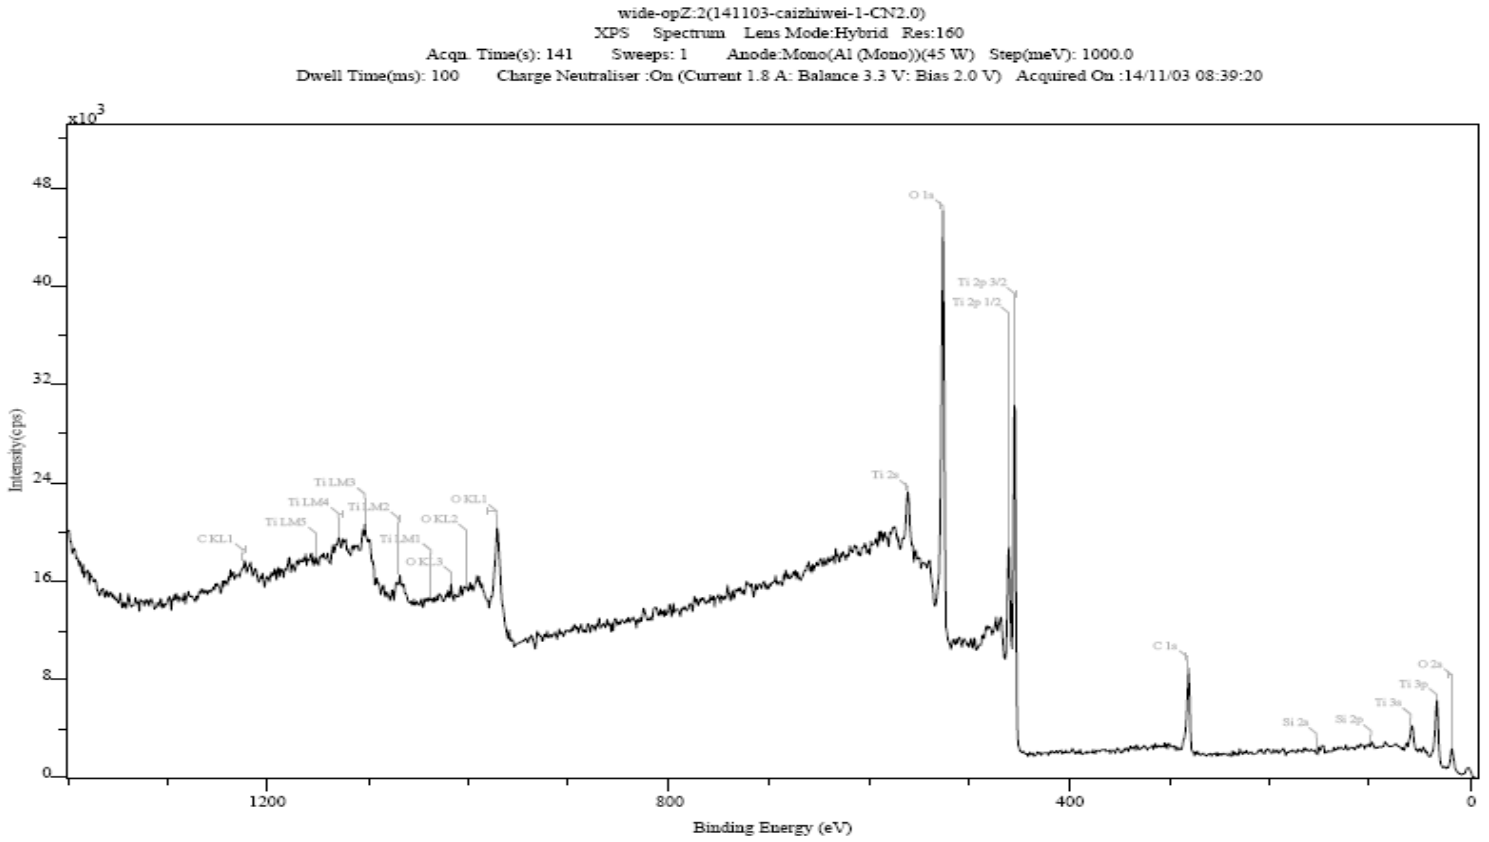

**Fig. S12** XPS signal of **B** for Ti *2p* region.

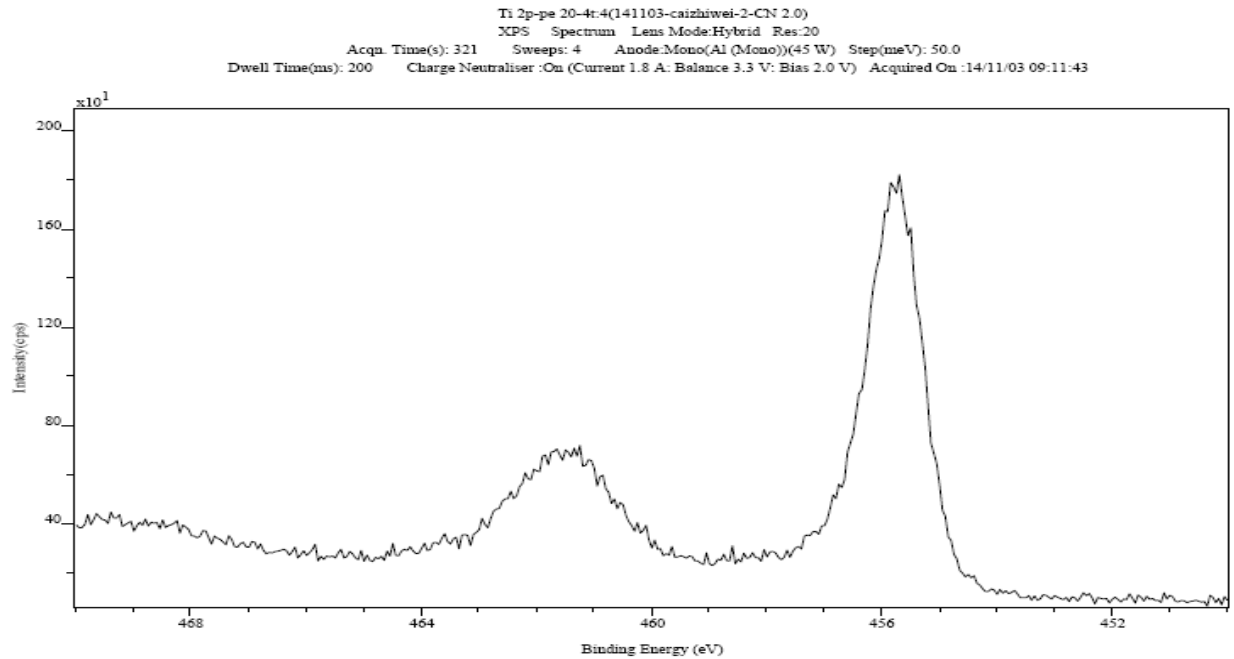



Fig. S13 XPS signal of B for Cl 2p region.

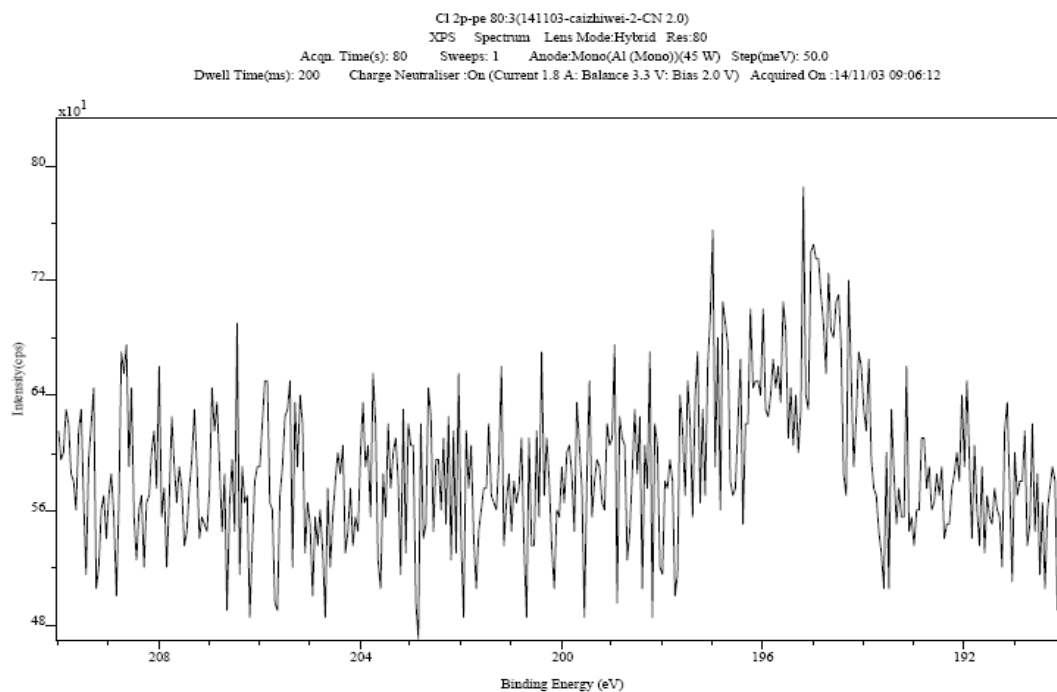

Fig. S14 XPS survey spectra of B

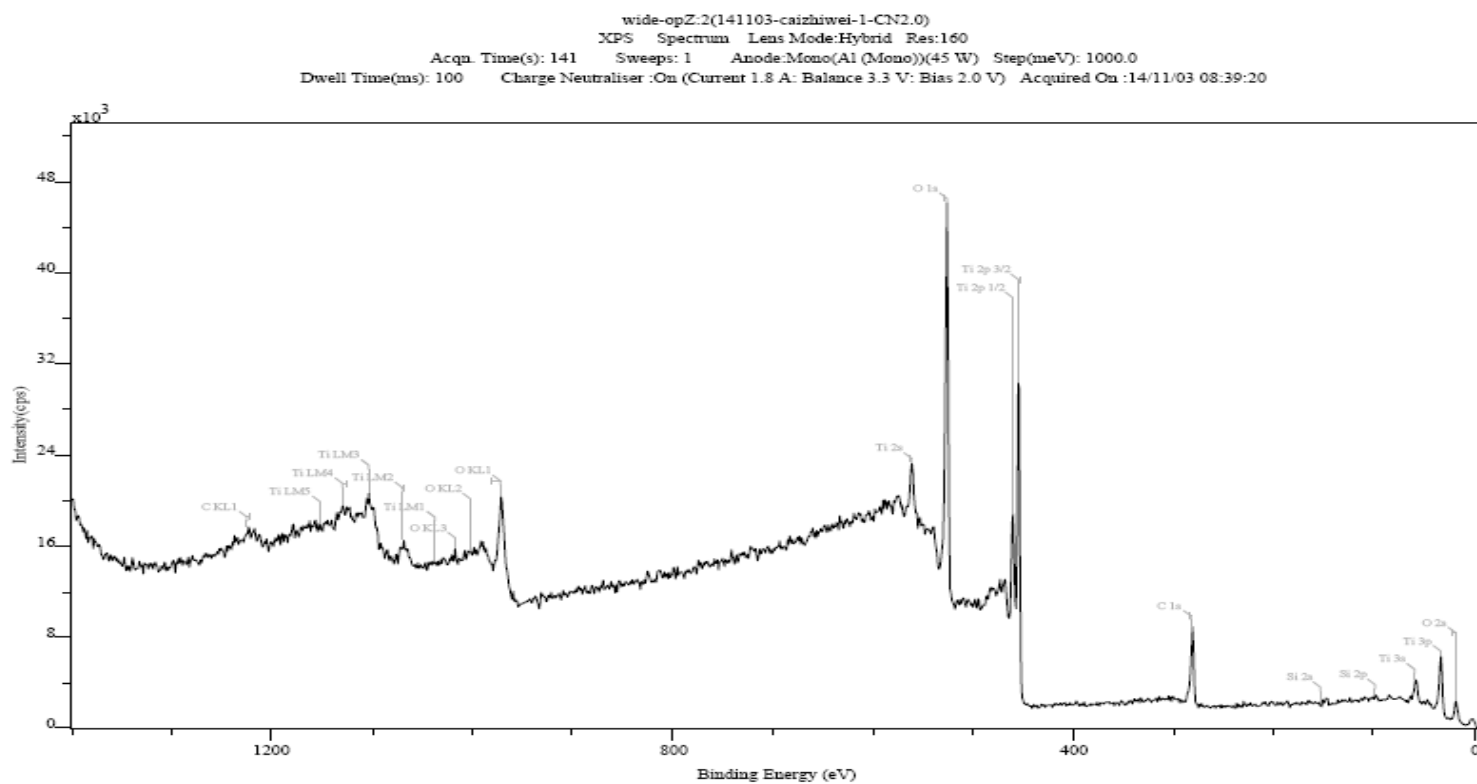

Supplement: c4ta05441e1.pdf [file c4ta05441e1.pdf]
